# Supplementary material for: Risk Factors Promoting External Ventricular Drain Infections in Adult Neurosurgical Patients at the Intensive Care Unit—A Retrospective Study
Source: PubMed Central journal article supplement (PMC8631749; doi:10.3389/fneur.2021.734156), 2021-11-08
Supplement: Table_1.pdf [file Table_1.pdf]

**Supplementary Table 1** Characteristics of patients with intrathecal vancomycin application with contamination or negative microbiological analysis

| Patient | Indication | No-infection subgroup | CSF cell count (per $\mu$ l) | Lactate (mmol/L) | CSF/Serum Glucose ratio | CRP (mg/dL) | WBC – count ( $10^9$ /L) | Temperature ( $^{\circ}$ C) | Systemic infection at the time of vancomycin start |
|---------|------------|-----------------------|------------------------------|------------------|-------------------------|-------------|--------------------------|-----------------------------|----------------------------------------------------|
| 33      | SAH        | neg. CSF-culture      | 1600                         | 3.2              | 0.58                    | 1.9         | 10.7                     | 38.3                        | no systemic infection                              |
| 34      | SAH        | neg. CSF-culture      | 1128                         | 7.1              | 0.16                    | 9.2         | 13.9                     | 38.5                        | no systemic infection                              |
| 35      | SAH        | neg. CSF-culture      | 912                          | 3.6              | 0.40                    | 0.4         | 12.5                     | 38.7                        | urinary tract infection                            |
| 36      | SAH        | neg. CSF-culture      | 1971                         | 5.6              | 0.24                    | 1.6         | 7.8                      | 38.0                        | Pneumonia                                          |
| 37      | SAH        | neg. CSF-culture      | 308                          | 2.5              | 0.62                    | 2.1         | 9.6                      | 38.2                        | no systemic infection                              |
| 38      | SAH        | neg. CSF-culture      | 2496                         | 6.2              | 0.40                    | 17.3        | 6                        | 36.1                        | Pneumonia                                          |
| 39      | SAH        | neg. CSF-culture      | 876                          | 2.5              | 0.54                    | 7           | 7.8                      | 37.5                        | Pneumonia                                          |
| 40      | SAH        | neg. CSF-culture      | 4779                         | 5.6              | 0.44                    | 12.8        | 6.7                      | 36.5                        | Urinary tract infection                            |
| 41      | ICH        | neg. CSF-culture      | 668                          | 3.8              | 0.43                    | 12.6        | 9.2                      | 38.0                        | no systemic infection                              |
| 42      | SAH        | neg. CSF-culture      | 456                          | 5.1              | 0.41                    | 3.8         | 13.3                     | 37.4                        | Pneumonia                                          |
| 43      | SAH        | neg. CSF-culture      | 859                          | 2.6              | 0.54                    | 0.1         | 10.5                     | 38.1                        | no systemic infection                              |
| 44      | SAH        | neg. CSF-culture      | 2645                         | 4.3              | 0.40                    | 26.6        | 13.1                     | 36.2                        | Urinary tract infection, Pneumonia                 |
| 45      | SAH        | contamination         | 995                          | 2.2              | 0.58                    | 17.8        | 9.4                      | 35.7                        | no systemic infection                              |
| 46      | SAH        | contamination         | -                            | -                | -                       | 3.8         | 12.2                     | 37.3                        | no systemic infection                              |
| 47      | Tumor      | contamination         | 533                          | 5.5              | 0.34                    | 10.1        | 12.4                     | 39.3                        | Pneumonia                                          |
| 48      | SAH        | contamination         | 1024                         | 3.0              | 0.40                    | 0.6         | 9.2                      | 38.4                        | Pneumonia                                          |
| 49      | SAH        | contamination         | 10                           | 3.4              | 0.51                    | 0.8         | 6.8                      | 37.4                        | no systemic infection                              |
| 50      | SAH        | contamination         | 161                          | 3.3              | 0.43                    | 1.3         | 10.4                     | 36.9                        | no systemic infection                              |
| 51      | Trauma     | contamination         | 18                           | 3.6              | 0.42                    | 3.5         | 8.6                      | 37.4                        | no systemic infection                              |

CRP C-reactive protein, CSF cerebrospinal fluid, ICH intracerebral hemorrhage, SAH subarachnoid hemorrhage, WBC white blood cell

**Supplementary Table 2** Clinical and laboratory data of patients with EVD associated infection (n=32)

| Parameters*                      | Number of patients (%) |
|----------------------------------|------------------------|
| Tmax above or equal 37.5°C       | 24 (75%)               |
| Cell count above 4 per $\mu$ l   | 31 (96.9%)             |
| Protein level above 45mg/dL      | 16 (50%)               |
| Lactate above 2.1mmol/L          | 25 (78.1%)             |
| Glucose <50% of systemic glucose | 15 (46.9%)             |
| CRP above 3mg/dL                 | 18 (56.2%)             |

\*Patients can be assigned into multiple categories

*CRP* C-reactive protein, *EVD* external ventricular drainage.

*Tmax* highest body temperature on the day of infection.
